# Supplementary material
Source: PubMed Central journal article supplement (PMC2032010)
Supplement: NIHMS29573-supplement-SFiglegends.pdf [file NIHMS29573-supplement-SFiglegends.pdf]

Supplemental Figure 3. Statistical Analysis and P values.

P values in panel (E) are: *hs:M* to *hs:NM* = 0.3, *hs:M* to *hs:rho* = 0.6, *hs:M* to *hs:rho; hs:msk* =  $4.4 \times 10^{-8}$ , *hs:NM* to *hs:rho* = 0.8, *hs:NM* to *hs:rho; hs:msk* =  $9.1 \times 10^{-9}$ , and *hs:rho* to *hs:rho; hs:msk* =  $5.3 \times 10^{-7}$ . P values in panel (F) are: *hs:M* to *hs:NM* =  $1.3 \times 10^{-4}$ , *hs:M* to *hs:rho* = 0.03, *hs:M* to *hs:rho; hs:msk* = 0.1, *hs:NM* to *hs:rho* =  $1.0 \times 10^{-5}$ , *hs:NM* to *hs:rho; hs:msk* =  $1.5 \times 10^{-5}$ , and *hs:rho* to *hs:rho; hs:msk* = 0.2.

**Supplementary Figure 8.** Direct vs. indirect mechanism for cytoplasmic hold.

Adult wings, anterior up, dotted lines in (B-F) and (H) indicate the A/P boundary, magnification equal in all panels, genotypes/driven elements indicated below panels. (A) Arrowheads denote extra vein tissue occurring in 30% of all adult wings of this genotype. (B) Wings look normal in 100% of all wings. (C) Arrow indicates incomplete L5 in <5% of all wings. (D) Wings look normal in 100% of all wings. (E) Arrowheads denote extra vein tissue. (F) Arrowhead denotes suppression of extra veins when compared to (E). (G) Arrowhead denotes extra vein near L4. (H) Arrowhead denotes suppression of extra vein near L4 when compared to (G).
