# Supplementary material
Source: PubMed Central journal article supplement (PMC2032010)

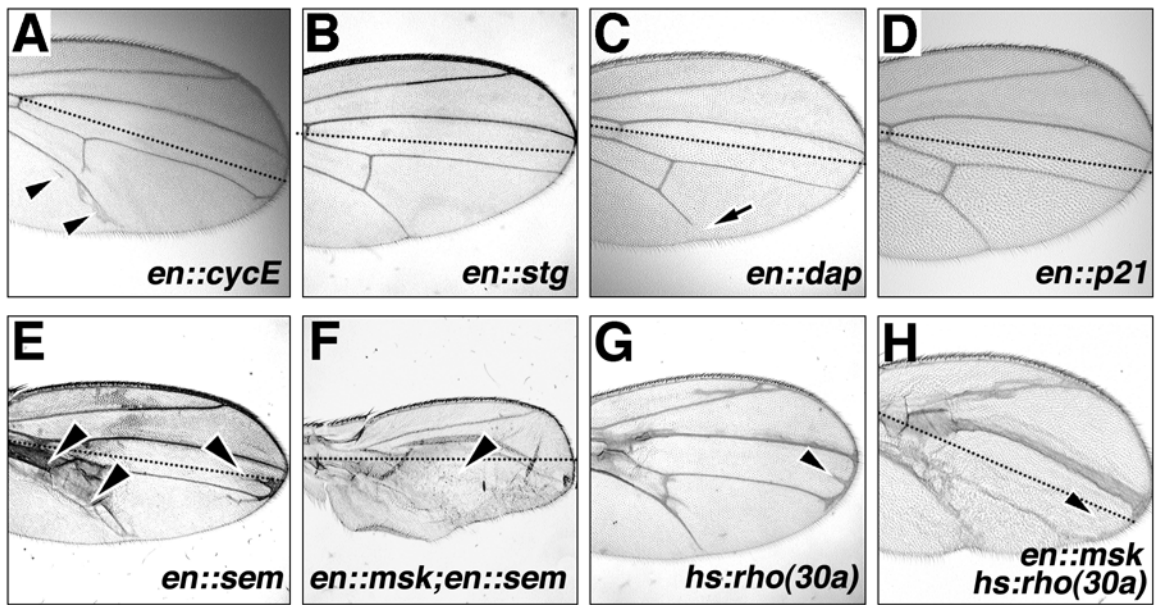

Marenda et al Fig 8

Supplement: NIHMS29573-supplement-SFig8.pdf [file NIHMS29573-supplement-SFig8.pdf]
